1 ***Direct Continuous EMG control of a Powered Prosthetic Ankle for Improved Postural Control***  
2 ***after Guided Physical Training: a Case Study***

3  
4 Aaron Fleming<sup>1</sup>, Stephanie Huang<sup>1</sup>, Elizabeth Buxton<sup>2</sup>, Frank Hodges<sup>3</sup>, He (Helen) Huang<sup>1\*</sup>

5  
6  
7  
8 <sup>1</sup>Joint Department of Biomedical Engineering, North Carolina State University and University of  
9 North Carolina at Chapel Hill, Raleigh, NC 27606, USA

10 <sup>2</sup>UNC Hospitals, Department of Rehabilitation Therapies, Chapel Hill, NC 27514, USA

11 <sup>3</sup>Prosthetic and Orthotic Fabrication, SunStone Lab LLC, Raleigh, NC 27615, USA

12 \*Corresponding Author: He (Helen) Huang – 4402D Engineering Building III, NC State  
13 University, Raleigh, NC 27606, 919-515-5218, [helen-huang@unc.edu](mailto:helen-huang@unc.edu)

14

15

16

17

18

19

20

21 **Abstract**

22 **Background**

23 Despite the promise of powered lower limb prostheses, the existing control of these modern  
24 devices is insufficient to assist many daily activities, such as postural control while lifting weight,  
25 that require continuous control of prosthetic joints according to human states and environments.  
26 The objective of this case study was to investigate the feasibility and potential of direct, continuous  
27 electromyographic (dEMG) control of a powered ankle prosthesis, combined with physical  
28 therapist (PT)-guided training, for improved standing postural control in an individual with  
29 transtibial amputation.

30 **Methods**

31 A powered prosthetic ankle was directly controlled by EMG signals of the residual *lateral*  
32 *gastrocnemius* and *tibialis anterior* muscles. The participant with transtibial amputation received  
33 4-week PT-guided training on posture while using the dEMG control of powered ankle. A subset  
34 of activities in the mini-BESTest (a clinical balance assessment tool) were used in the training and  
35 evaluation protocol. We quantified EMG signals in the bilateral shank muscles, biomechanics that  
36 captures postural control and stability, and score for the clinical balance evaluation.

37 **Results**

38 Compared to the participant's daily passive prosthesis, the dEMG-controlled ankle, combined with  
39 the training, yielded improved clinical balance score and reduced compensation from the intact  
40 joints. In addition, cross correlation coefficient of bilateral CoP excursions, a metric for  
41 quantifying standing postural control, increased to  $0.83(\pm 0.07)$  when using dEMG ankle control,  
42 compared with  $0.39(\pm 0.29)$  when using the passive device. Between-limb coordination was also  
43 observed as synchronized activation of homologous muscles in the shank. We witnessed rapid

44 improvement in performance on the first day of the training for load transfer tasks, where bilateral  
45 CoP synchronization improvement was significantly related to repetition order ( $R=0.459$ ,  $p =$   
46  $0.045$ ). Finally, the participant further improved this performance significantly across training  
47 days.

#### 48 **Conclusion:**

49 This case study showed the feasibility of dEMG control of powered prosthetic ankle by a transtibial  
50 amputee after a PT-guided training to assist postural control. This study's training protocol and  
51 dEMG control method that lays the foundation for future study to extend these results through the  
52 inclusion of more participants and activities.

53

#### 54 **Keywords**

55 Transtibial amputee, Postural Control, Myoelectric Control, Training, Dynamic Standing Balance

56

## 57 **Introduction**

58 Recent advances in intelligent, powered prosthetic legs have opened up opportunities for  
59 individuals with lower limb amputations to restore their normative walking patterns on uneven  
60 terrains [1-9]. These modern devices use primarily autonomous control, which is, however,  
61 inadequate to assist other important daily tasks that involve unpredictable, non-cyclic motor  
62 behavior and require continuous coordination with the user's motor control and environments. One  
63 example of such activities is anticipatory and compensatory postural control in standing, walking,  
64 or other recreation activities [10, 11].

65 Focusing on standing postural control, lower limb amputees wearing passive prostheses have  
66 shown decreased postural stability and increased compensation from the intact limb [12, 13]. This  
67 is partly because of the lack of active degrees of freedom in the prostheses. Powered prostheses  
68 have active, controllable joints and, therefore, a potential to enhance the amputees' postural  
69 stability. Unfortunately, there has been no autonomous control solutions to assist amputees'  
70 standing posture because it is difficult to predict the postural perturbations and human motor  
71 control strategy for counteracting the perturbations. We are aware of only one research group,  
72 developing autonomous prosthesis control to assist posture stability of the prosthesis users when  
73 standing on slopes [14]. The controller detected the inclination angle after the prosthesis foot was  
74 on a slope and then adjusted equilibrium position of prosthesis joint in order to support the  
75 amputee's standing posture. This automated control was reactive and limited in function because  
76 it can assist standing posture on a slope only, and it acted only after the prosthesis foot was on an  
77 incline. Hence, this prosthesis control was insufficient to assist anticipatory postural control (i.e.,  
78 action before the perturbation happens) or handle the postural control under dynamic perturbations

79 (e.g. weight transfer), which requires continuous postural control based on the shift of center of  
80 mass (COM).

81 As human neural control system is highly adaptable to the task context, perhaps neural control of  
82 prosthetic joint can be a viable solution to assist the amputee's postural control and balance  
83 stability. EMG signals of the residual muscles are readily-available efferent neural sources in  
84 amputees and has been used for neural control of prosthetic legs in walking. Many groups have  
85 used EMG pattern recognition to classify the user's locomotor tasks, switching autonomous  
86 prosthesis control mode accordingly for enabling seamless locomotor task transitions [15-19].  
87 Another group used EMG signal magnitude recorded from the residual *medial gastrocnemius*  
88 (GAS) to proportionally modulate a control parameter in the automated prosthesis control in the  
89 push-off phase [20]. Both aforementioned approaches relied on autonomous prosthesis control  
90 laws and cannot produce neural control of prosthetic joints continuously. Three other groups  
91 conducted case studies to show the feasibility of direct EMG (dEMG) control in walking, in which  
92 EMG magnitude of one or a pair of residual antagonistic muscles are directly mapped to modulate  
93 the applied torque to the prosthetic joints continuously [21-23]. In dEMG control, the behavior of  
94 prosthetic joints is primarily and continuously determined by human neuromuscular control,  
95 mimicking human biological joint control. Note that the existing studies on EMG control of  
96 powered prosthetic legs, regardless the methods used, focuses on locomotor tasks mainly. Little  
97 effort has been aimed to address postural control.

98 One of the main challenges in implementing direct EMG control of a prosthesis, although  
99 technically simple, is whether amputees are capable of producing coordinated activations between  
100 the residual antagonist muscles for operating a prosthesis joint in dynamic task performance.

101 Previous studies have shown a large variation among transtibial amputees in producing  
102 coordinated activity between the residual *tibialis anterior* (TA) and GAS in a sitting posture or  
103 walking [22, 24, 25]. These results implied that individuals with transtibial amputations might no  
104 longer manifest normative activation in the residual muscles due to the limb amputation. Luckily,  
105 evidences have also shown that training or practice is a potential way to improve the capability of  
106 amputees in modulating residual muscles' activity for dEMG control. Our previous study [26]  
107 tested transtibial amputees in dEMG control of a virtual inverted pendulum, mimicking the  
108 dynamics of standing posture. We noted improved task performance for all the amputee  
109 participants after a short-term practice within the same experimental visit. However, the amount  
110 of improvement varied significantly among the participants. Acclimation to dEMG control has  
111 involved repeating the evaluated task (walking) for an extend period of time [21, 27], or visualizing  
112 phantom limb movements [28]. For Huang et al. [27] transtibial amputees did not adapt activation  
113 of their residual GAS until they were given visual feedback of their prosthetic ankle angle with a  
114 target trajectory. However, it was unclear whether, after removing biofeedback training, amputees  
115 could still reproduce desired ankle joint trajectories or continue to improve control. Dawley et al.  
116 [21] observed improvements residual muscle activity after simply repeated walking sessions with  
117 a single above-knee amputee. From the findings of previous studies we postulate that amputees  
118 might adapt and learn the necessary muscle activation pattern for control function after training  
119 and practice. We expand the work of previous studies by 1) Creating and implementing an four-  
120 week PT-guided training paradigm without supplementary feedback of the ankle prosthesis 2)  
121 Implementing activity from *both* TA and GAS residual muscles for direct, continuous prosthetic  
122 ankle control and 3) Investigating the ability for an amputee to improve standing postural control  
123 with this control paradigm.

124 In this paper we present a case study to demonstrate the feasibility and potential benefit of dEMG  
125 control of a powered ankle prosthesis on an individual with a transtibial amputation for enhanced  
126 postural stability. Since training is likely necessary for successful application of dEMG control,  
127 the case study included four-week of physical therapist (PT)-guided training. Via this case study,  
128 we are interested in learning (1) how a transtibial amputee learns residual muscle activation  
129 patterns and coordination necessary for driving a powered ankle prosthesis for postural control,  
130 and (2) whether dEMG control of a powered ankle can improve the postural stability of transtibial  
131 amputees, compared to the currently prescribed passive prostheses. The results may inform the  
132 needed training protocol for dEMG control of prosthetic ankle and the future development of  
133 versatile powered prostheses that can assist various activities of individuals with transtibial  
134 amputations.

135

## 136 **Materials and Methods**

### 137 *Participant*

138 We recruited one amputee participant to take part in this case study. The participant provided  
139 informed, written consent to participate in this Institutional Review Board approved study at the  
140 University of North Carolina at Chapel Hill. The participant was 57 years old and 3 years post-  
141 amputation with septic shock as the cause. The participant weighed 131kg. The participant used a  
142 pin-lock suspension and a Pro-Flex foot (Össur) daily. For the purpose of the study the participant  
143 was fit with a new prosthetic socket (StabileFlex, Coyote Design). This transtibial socket design  
144 provided more room in the anterior-posterior direction while still maintaining adequate fit by  
145 loading the medio-lateral sides of the residual limb more heavily. This socket design provided  
146 more room for the residual *tibialis anterior* and residual *gastrocnemius* muscles to contract

147 compared to traditional socket designs, which increased comfort of residual muscle contractions  
148 within the socket and reduced residual muscle fatigue. On a daily basis the participant used his  
149 passive prosthesis for household and community ambulation. He was able to traverse  
150 environmental barriers without requiring an assistive device and was independent with daily tasks,  
151 including driving.

152

153 As a case study we sought to understand how an amputee with relatively average control of his  
154 residual muscles would perform in this extended training with a dEMG controlled prosthesis. Thus,  
155 we recruited this participant based on his EMG control performance with his residual antagonistic  
156 muscles in a previous study [26] (participant TT2).

157

### 158 *Clinical Screening*

159 We conducted a sensory screening of the participant before the start of the study. A trained physical  
160 therapist performed a sensation screen of the participant's residual and intact limb. We noted  
161 partial neuropathy in the participants intact foot. The participant had diminished light touch  
162 sensation distal to the ankle joint. The participant had absent light touch sensation at the medical  
163 aspect of the intact foot. Above the ankle joint, the participant was able to localize light touch  
164 sensation stimuli in all dermatomes bilaterally.

165

### 166 *Device and Setup*

167 We used an experimental ankle prosthesis driven by pneumatic artificial muscles (PAM) as the  
168 platform for testing proportional myoelectric control (dEMG control) with residual  
169 muscles. Technical information about the device can be found [29]. This device was initially



170 developed for the study of continuous, proportional myoelectric control of plantarflexion during  
171 level-ground walking [27]. In this study we implemented continuous control of both dorsi- and  
172 plantar-flexion using two sets of proportional pressure valves (MAC Valves, Wixom, MI, USA)  
173 with two valves allocated to each PAM for a total of 8 valves. The input control signal for the  
174 control valves was 0-10V which corresponded to a pressure output of 0-90psi proportionally.

175  
176 We processed electromyographic (EMG) signals from residual *tibialis anterior* (TA) and residual  
177 *lateral gastrocnemius* (GAS) muscle in real-time (dSPACE, CLP-1103, 0-10V output) to create a  
178 smoothed control signal for each set of pressure valves. The real-time setup created a smoothed  
179 control signal by first applying a high-pass filter (100Hz, 2nd Order Butterworth) to reduce the  
180 effect of potential signal artifacts. The setup then rectified the signal and applied a low-pass filter  
181 (2Hz, 2nd Order Butterworth). The smoothed signal for each respective muscle was then sent to  
182 the pressure regulators, which generated pressure proportionally to the input voltage to actuate the  
183 device.

184  
185 We applied a baseline signal from the setup for both pairs of muscles to set a base stiffness for the  
186 ankle prosthesis. While the dEMG control was off, and the prosthesis unloaded, we applied a  
187 baseline signal that generated a neutral ankle position (5-7 degrees dorsiflexion). We then asked  
188 the participant to stand and we adjusted baseline signals based on the perceived baseline stiffness  
189 compared with his intact ankle. After iterating this process, we established a baseline signal of  
190 ~3V for the plantar- and dorsi-flexor muscles. When the participant had active control (dEMG  
191 control was turned on) we observed an average tonic activity from the residual muscles (~1.3V  
192 from residual GAS, ~1V from residual TA) across sessions. In order to allow the participant true

193 continuous control of the prosthetic device we did not enforce an EMG threshold that would  
194 restrict low-level activity from controlling the device. We applied a gain to each control signal at  
195 the beginning of each session in order that a maximum contraction generated a control signal  
196 between 9-10V.

197

### 198 *Introduction to the system*

199 Before the initial evaluation and training, we introduced the amputee participant to the direct EMG  
200 control paradigm and the pneumatic ankle device. While sitting, the participant wore the powered  
201 ankle prosthesis and was given time to freely move the ankle joint via residual muscle contractions.  
202 During this free exploration we provided visual feedback of his residual muscle activation as a  
203 percentage of his maximum voluntary contraction (%MVC). In order to facilitate learning the  
204 dynamics (i.e. possible combinations of ankle joint stiffness) we then asked the participant to fill  
205 a virtual control input space with his residual antagonistic muscle contractions (as described in  
206 [30]). We then repeated these steps while the amputee participant stood with handlebar support  
207 available to him. We took these steps to provide the participant with a clear understanding of the  
208 input-output relationship of reciprocal activation and co-activation of his residual muscles to  
209 changes prosthetic ankle joint dynamics. After this introduction stage we did not provide the  
210 amputee participant visual feedback of residual muscle activations.

211

### 212 *Training and Evaluation Sessions*

213 The study consisted of an initial evaluation, 5 training sessions, a final evaluation, and a  
214 supplementary evaluation. The timeline for training and evaluation sessions are outlined (Table  
215 1).

216

217 For the evaluation sessions we asked the participant to perform quiet standing tasks across various  
218 sensory conditions. The four tasks selected involve quiet standing under two visual conditions,  
219 Eyes Open (EO) and Eyes Closed (EC), and two surface conditions, Firm and Foam, as described  
220 by the BESTest [31]. These tasks were scored by a trained physical therapist on a scale from 0-3  
221 where when the participant stood stably for 30 seconds (score = 3), 30 seconds unstable (score =  
222 2), stood less than 30 seconds (score = 1), and unable (score = 0) [31].

223

224 For the training sessions we selected tasks relevant to daily life activities: Load transfer, Sit-to-  
225 Stand, Forward reach, and Arm raise. These tasks (with the exception of the load transfer) are also  
226 a subset of evaluation tasks in the BESTest [31]. We selected these training tasks to differ from  
227 the evaluation tasks in order to understand the effect of training to overall standing stability, as  
228 opposed to task-specific stability, while using the dEMG control of a prosthetic ankle. At the start  
229 of each training session we asked the amputee to stand with his prosthetic foot on a rocker-board  
230 and intact foot on firm ground for 30 seconds. During training the participant completed 2 trials of  
231 each task per session, with a minimum of 4 repetitions per trial. The number of repetitions  
232 increased across days, as prescribed by the physical therapist, where day 4 of the training sessions  
233 (Table 1) had 20 total repetitions of each task.

234

235 We conducted the study over the course of 25 days. We gave a minimum of 1 day of rest between  
236 sessions in order to reduce fatigue effects and a maximum of 4 days of rest between sessions to  
237 minimize learning losses. We conducted training with the dEMG controlled device only. We  
238 evaluated standing stability with both passive and dEMG controlled devices on the first day. After

239 training, we performed a follow-up evaluation with the dEMG control. In order to compare  
 240 postural control strategies in training tasks across devices we conducted a supplementary  
 241 evaluation session where the participant repeated the training tasks while wearing his passive  
 242 device.  
 243

**Table 1.** Clinical Standing Balance Evaluation and Training Timeline

| Day                 | Day 1                                                                         | Day 2                                                                               | Day 3 | Day 4 | Day 5 | Day 6                                                                       | Day 7                                                                               | Day 8 |
|---------------------|-------------------------------------------------------------------------------|-------------------------------------------------------------------------------------|-------|-------|-------|-----------------------------------------------------------------------------|-------------------------------------------------------------------------------------|-------|
| <b>Session Type</b> | Passive Prosthesis & dEMG Prosthesis Evaluation*                              | Training (dEMG only)                                                                |       |       |       | dEMG Evaluation                                                             | Supplementary Eval. (Passive only)                                                  |       |
| <b>Tasks</b>        | Quiet Standing:<br>1) Firm, EO**<br>2) Firm, EC<br>3) Foam, EO<br>4) Foam, EC | Rocker Board Warm-up<br>Arm Raise<br>Forward Reach<br>Load Transfer<br>Sit-to-Stand |       |       |       | Quiet Standing:<br>1) Firm, EO<br>2) Firm, EC<br>3) Foam, EO<br>4) Foam, EC | Rocker Board Warm-up<br>Arm Raise<br>Forward Reach<br>Load Transfer<br>Sit-to-Stand |       |

\* Passive prosthesis evaluation conducted first \*\* EO: Eyes Open, EC: Eyes Closed

244  
 245 A trained clinician attended each training session with the participant. During each training session  
 246 the clinician observed the participant complete each task. Between repetitions, the clinician  
 247 provided feedback to the participant regarding his full-body symmetry, body mechanics, foot  
 248 positioning, and alignment. The clinician provided feedback to encourage equal contribution from  
 249 both limbs toward the specific task. The patient received verbal cues to shift his weight onto his  
 250 prosthetic side and to recruit muscles in a “toes up” or “toes down” direction when learning each  
 251 task. This directional cue is the same language used when he performed his warm-up on the rocker  
 252 board. He also required cues to shift his weight onto his prosthetic side, especially for tasks such  
 253 as sit to stand transfers in which he was accustomed to compensating for an ankle that was  
 254 relatively fixed, whereas the power prosthesis allowed for movement in the sagittal plane.  
 255

256 *Measurements*

257 During all sessions we recorded activity from the residual and intact shank muscles. Specifically,  
258 we placed EMG sensors (Neuroline 715, 1mm height) on residual *lateral gastrocnemius* and  
259 residual *tibialis anterior* muscles (Figure 1). We located residual muscle bellies via palpation while  
260 the participant contracted and relaxed his muscles [32]. We then routed cables away from bony  
261 landmarks and connected them to a pre-amplifier (Motion Lab Systems, MA-412, Gainx20)  
262 outside of the prosthetic socket. We placed EMG sensors (Motion Lab Systems, MA-420,  
263 Gainx20) on intact GAS and intact TA muscles. We connected all sensors to an amplifier (MA300-  
264 XVI, Gain x1000).

265  
266 For all sessions we collected Center of Pressure (CoP) locations under each foot using an  
267 instrumented split-belt treadmill (1000Hz, Bertec Corp.). For the final session of training (Day 6)  
268 and the supplementary passive evaluation session (Day 8) we collected full-body kinematics using  
269 motion capture (100Hz, 53 markers, VICON, Oxford, UK).

270

271 *Data Analysis*

272 We processed all data offline using Matlab (Mathworks, Natick, MA). We analyzed all quiet  
273 standing trials where the participant was able to maintain balance for the entire trial without  
274 stepping. Since the participant was unable to maintain balance in the dEMG control, Pre-Training,  
275 Foam condition, we used the score given by the physical therapist for comparison. For the training  
276 sessions and supplementary evaluation, we analyzed data from the load transfer tasks only. We  
277 selected the load transfer task for analysis since this was self-reportedly the most difficult task for  
278 the participant during training.

279

280 For the training session analysis, we extracted and evaluated each repetition of the load transfer  
281 task. Each repetition was manually extracted through visual inspection of the summed vertical  
282 ground reaction forces in order to determine the moment the weight was picked up (before pick-  
283 up the weight was located beside the instrumented treadmill). Based on the speed of movement  
284 during training we empirically windowed each repetition to  $\pm 2$ s on either side of the moment of  
285 pick-up.

286

287 For all evaluation trials and load transfer repetitions we calculated synchronization of CoP  
288 excursions in the Anterior-Posterior direction under each foot by taking the cross-correlation  
289 between the time series [33]. For each trial, we subtracted the mean CoP values from each foot  
290 and conducted a cross-correlation of the times series using MATLAB (xcorr). We determined the  
291 cross-correlation coefficient at time zero ( $CC_0$ ), max cross-correlation coefficient ( $CC_{max}$ ), and the  
292 lag value ( $Lag_{CC}$ ) in milliseconds from time zero to  $CC_{max}$ .  $CC_{max}$  and  $Lag_{CC}$  are calculated to  
293 determine potential lag in CoP excursions between limbs using a window of  $\pm 1$ s [33].

294

295 For the final training session (dEMG control) and in the supplementary session (passive) we  
296 analyzed ankle, knee, and hip joint flexion during the load transfer task. We calculated joint angles  
297 in the sagittal plane [34] for each windowed repetition. We then subtracted joint angles during  
298 quiet standing from all repetitions for each condition. We tabulated peak hip, knee, and ankle  
299 flexion angles during the windowed repetitions.

300

301 In order to analyze the neural control strategy used by the participant we processed EMG activity  
302 from residual and intact TA and GAS muscles. We first high-pass filtered the raw EMG signal  
303 (Butterworth, 2<sup>nd</sup> order, 100Hz cutoff) from all muscles to remove potential motion artifacts. We  
304 rectified the signals and applied a low-pass filter (Butterworth, 2<sup>th</sup> order, 20Hz cutoff) in order to  
305 generate a smoothed signal for qualitative comparison. We then selected representative repetitions  
306 from the first and final day of training based on  $CC_0$  values that were closest to the average  $CC_0$   
307 for that day of training. We then plotted CoP excursion, EMG activity from residual and intact TA  
308 and GAS, and residual TA and GAS control signals together for qualitative comparison.

309

### 310 *Statistical Analysis*

311 For our statistical analysis of the data we used the statistical software (JMP, SAS, US). We used a  
312 one-way ANOVA to compare the  $CC_0$ ,  $CC_{max}$ , and  $Lag_{CC}$  with Training Day as the main effect.  
313 We used the Shapiro-Wilk normality test ( $p < 0.01$ ) to detect outlier repetitions. One repetition was  
314 removed from our analysis (repetition 2, day 1 training,  $CC_0 = -0.4$ ). We ran a simple linear  
315 regression to determine the amount of variance (via R-squared) described by trial order in each  
316 training session  $CC_0$ ,  $CC_{max}$ , and  $Lag_{CC}$ . We analyzed joint flexion angles in the load transfer task  
317 between dEMG control and passive device. We used a two-way ANOVA to detect main and  
318 interaction effects of Device and Joint. When we found a significant effect, we tested for statistical  
319 differences within joint and device conditions using Tukey's honestly significant difference test ( $\alpha$   
320 = 0.05). Significance thresholds were set using an alpha value of 0.05.

321

## 322 **Results**

323 *Quiet Standing Evaluation: Clinical Scoring of Stability*

324 We observed clear improvements in stability with the dEMG control of the powered ankle in the  
 325 quiet standing tasks post-training (Table 2). In the pre-training condition, the amputee displayed  
 326 moderate instability on the firm surface for both eyes open and eyes closed, evidenced by visually  
 327 noticeable sways (*score* = 2). In the foam surface the amputee was unable to maintain balance  
 328 without stepping in either condition (*score* = 1). Post-Training, the amputee improved stability  
 329 over all conditions (*score* = 3). In all surface and vision conditions the participant did not display  
 330 visually significant sways and did not require the use of any handlebars.  
 331

**Table 2:** Quiet Standing Tasks Clinical Score and Between Limb Synchronization

| Device                              | Surface | Condition   | Score (BESTest) | CC <sub>0</sub>            |
|-------------------------------------|---------|-------------|-----------------|----------------------------|
| <i>Passive</i>                      | Firm    | Eyes Open   | 2               | 0.395                      |
|                                     |         | Eyes Closed | 2               | 0.654                      |
|                                     | Foam    | Eyes Open   | 2               | -0.004                     |
|                                     |         | Eyes Closed | 2               | 0.540                      |
| <i>dEMG control (Pre-Training)</i>  | Firm    | Eyes Open   | 2               | 0.590                      |
|                                     |         | Eyes Closed | 2               | 0.460                      |
|                                     | Foam    | Eyes Open   | 1               | Insufficient Data (9s max) |
|                                     |         | Eyes Closed | 1               | Insufficient Data (2s max) |
| <i>dEMG control (Post-Training)</i> | Firm    | Eyes Open   | 3               | 0.875                      |
|                                     |         | Eyes Closed | 3               | 0.863                      |
|                                     | Foam    | Eyes Open   | 3               | 0.874                      |
|                                     |         | Eyes Closed | 3               | 0.726                      |

332  
 333 We observed differences in stability between the passive (baseline) and dEMG controlled  
 334 condition (Post-Training) (Table 2). With his passive device the amputee was able to maintain  
 335 balance in all conditions with significant postural sway, and the use of handlebars was not needed  
 336 (*score* = 2). With dEMG control, post-training, the amputee had minimal postural sways for all  
 337 conditions (*score* = 3).  
 338  
 339 *Quiet Standing Evaluation: Between-Limb Synchronization*



340 The participant demonstrated distinct patterns of bilateral center of pressure excursions between  
341 the passive and dEMG control (Post-Training) for the quiet standing tasks. Figure 2 shows this  
342 stark contrast in the foam condition where the participant displayed noticeably higher  
343 synchronization between his intact and prosthetic foot CoP<sub>AP</sub> excursion with dEMG control (EO  
344  $CC_0 = 0.874$ , EC  $CC_0 = 0.726$ ) compared with his passive device (EO  $CC_0 = 0.004$ , EC  $CC_0 =$   
345  $0.540$ ). We observed this increase in synchronization during dEMG control in firm surface  
346 conditions as well (Table 1). The magnitude of CoP<sub>AP</sub> excursion of the prosthetic foot in the  
347 passive device was less than the intact limb CoP<sub>AP</sub> excursion as evidenced by time series plots  
348 (Figure 2a,b). The participant increased CoP<sub>AP</sub> excursion on the prosthetic side post-training with  
349 dEMG control (Figure 2c,d).

350

351 In dEMG control, the amputee demonstrated improvements in between limb synchronization after  
352 training for all quiet standing conditions (Table 2 & Figure 3). In the firm condition, pre-training,  
353 we observed moderate cross-correlation in CoP excursions between the intact and dEMG  
354 controlled foot (EO  $CC_0 = 0.590$ , EC  $CC_0 = 0.460$ ) (Figure 3a,b). Post-training, the participant  
355 more closely synchronized CoP excursions between the two feet (EO  $CC_0 = 0.875$ , EC  $CC_0 =$   
356  $0.863$ ) (Figure 3c,d) in the firm condition. During the initial evaluation the amputee was unable to  
357 maintain balance in the foam condition thus we did not evaluate  $CC_0$  for the pre-training, dEMG  
358 control condition. However, the amputee demonstrated similar synchronization values between  
359 firm and foam conditions in the post-training condition (*foam*: EO  $CC_0 = 0.874$ , EC  $CC_0 = 0.726$ ).

360

361 *Training Evaluation: Load Transfer Task*

362 Over the course of training the amputee significantly improved between-limb synchronization of  
363 CoP excursion. In the initial trials of the load transfer task, the participant displayed moderate  
364 levels of synchronization ( $CC_0 = 0.49(\pm 0.16)$ ,  $CC_{\max} = 0.52(\pm 0.14)$ ,  $CC_{\text{lag}} = -107.3\text{ms} (\pm 357.1)$ )  
365 (Figure 4) similar to synchronization values observed during the initial evaluation. We observed  
366 that  $CC_{\max}$  and  $CC_0$  improved significantly over the course of just the first day, where  $CC_{\max}$  and  
367  $CC_0$  are significantly related to repetition order ( $CC_{\max}$ :  $R^2 = 0.459$ ,  $p = 0.045$ ;  $CC_0$ :  $R^2 = 0.646$ ,  $p$   
368  $= 0.009$ ) (Figure 4). We determined this relationship was significant for the first day, however not  
369 for the trial order in the remaining days. Across training, day was found to be a significant main  
370 effect for  $CC_{\max}$  ( $p = 0.011$ ) and  $CC_0$  ( $p = 0.006$ ), but not for  $CC_{\text{lag}}$  ( $p = 0.279$ ). At the final day  
371 of training we observed CC values of ( $CC_0 = 0.76(\pm 0.15)$ ,  $CC_{\max} = 0.76(\pm 0.16)$ ,  $CC_{\text{lag}} = -22.8\text{ms}$   
372  $(\pm 32.79)$ ).

373  
374 Analysis of EMG patterns during representative load transfers demonstrated distinct neural  
375 strategies between initial and final trials (Figure 5). These specific repetitions were chosen since  
376 their  $CC_0$  value closely matched average  $CC_0$  values for the initial and final day of training. Pre-  
377 training, we observed different timing and shape of EMG activity between the residual and intact  
378 limb. The participant intermittently activated the intact TA (Figure 5a) with a steady contraction  
379 of the GAS muscle throughout the movement (Figure 5b). In comparison the amputee had little to  
380 no activation from the residual TA before peak squat depth (Figure 5a,c) followed by significant  
381 activation of the GAS while returning to the standing posture (Figure 5b,c). The control signal  
382 reached half of its force generating potential (5V ~ 50psi) in the plantar-flexor direction during  
383 this movement (Figure 5c). Post-training, the strategy between the two limbs appeared more  
384 closely aligned. Activations from the residual TA were seemingly identical to activations from the

385 intact TA (Figure 5e). Intact and residual GAS muscle activations were relatively aligned (Figure  
386 5f) with the exception of activation of the intact GAS muscle before reversal of the squatting  
387 motion (Figure 5f). The control signal to the prosthesis (Figure 5c,g) mostly clearly demonstrated  
388 residual antagonistic pair control strategy across training. In final trials we observed high  
389 activations of the residual TA at the beginning of the movement, followed by small contractions  
390 from the residual GAS and co-contraction post-squat (Figure 5g). CC of CoP<sub>AP</sub> excursions  
391 demonstrate the similarity in control strategy between limbs (Figure 5h).

392

### 393 *Load Transfer Task: Postural Control Strategy*

394 Post-training, we observed significantly different postural strategies between the passive and  
395 dEMG controlled device for the load transfer task. We observed small flexion angles for the  
396 passive ankle prosthesis during the load transfer (Table 3 & Figure 6). With dEMG control post-  
397 training, the ankle flexion angle significantly increased (Passive-dEMG,  $p < 0.0001$ ). For the  
398 dEMG control condition the knee flexion angle also increased (Passive-dEMG,  $p < 0.0001$ ) and  
399 the hip flexion angle decreased (Passive-dEMG,  $p < 0.0001$ ). We observed a significant interaction  
400 between the device and joint ( $p < 0.0001$ ).

**Table 3:** Load Transfer Joint Angle (Passive vs. Post-Training dEMG Control)

| Joint                     | Device                |                            |
|---------------------------|-----------------------|----------------------------|
|                           | Passive Flexion (deg) | dEMG Control Flexion (deg) |
| Ankle                     | 4.07(±0.71)           | 25.59(±4.33)               |
| Knee                      | 51.00(±3.51)          | 77.08(±4.70)               |
| Hip                       | 103.89(±5.07)         | 86.55(±2.47)               |
| <b>Device Main Effect</b> |                       | <b>p &lt; 0.0001</b>       |
| <b>Joint Main Effect</b>  |                       | <b>p &lt; 0.0001</b>       |
| <b>Interaction Effect</b> |                       | <b>p &lt; 0.0001</b>       |

401

## 402 **Discussion**

403 In this study, we present the feasibility of direct EMG control to continuously operate prosthetic  
404 ankle joint mechanics in order to address the postural stability for individuals with transtibial  
405 amputations. The main finding of this study is that our recruited transtibial amputee participant  
406 was capable of using residual antagonist muscles to directly and continuously control a prosthetic  
407 ankle to significantly improve standing postural control, after 4 weeks of PT-guided training  
408 sessions, across various contexts compared with postural control using a passive ankle prosthesis  
409 as the baseline after . Completely different from the “standard” control framework for active lower  
410 limb prostheses and exoskeletons as suggested in [35] that relies on preprogrammed, discrete finite  
411 state machines and prescribed control laws, dEMG control used in this case study continuously  
412 drives a powered prosthesis joint based purely on the user’s neural control signals (i.e. motor  
413 commands) from the residual GAS and residual TA muscles. This device offered the amputee user  
414 the freedom to continuously adjust the behavior of prosthetic ankle (i.e. control both position and  
415 stiffness independently), which allows the amputee user to freely adapt their prosthesis behavior  
416 to accommodate versatile activities of daily life. We chose different postural control tasks during  
417 standing in this study, as the first step, to demonstrate the potential of dEMG control for standing  
418 postural control tasks that requires continuous coordination of residual muscle activation. Using  
419 preprogrammed autonomous control to accommodate versatile activities of daily life has been  
420 difficult because it requires the autonomous controller to seamlessly coordinate its behavior with  
421 a multitude of environments, contexts, and user intent.

422

423 One of the interesting observations in this study was that enabling neural control of a prosthetic  
424 ankle on the amputated side elicited improved motor coordination between the intact limb and  
425 amputated limb during postural control. The between-limb coordination was manifested by (1)

426 synchronized CoP anterior-posterior excursion and (2) synchronized shank muscle activation.  
427 First, we observed a significant improvement in between-limb synchronization of CoP excursion  
428 during standing postural control when the TT amputee can actively use prosthetic ankle via neural  
429 control, compared to when he used passive device. Between-limb CoP synchronization has  
430 developed over recent years into a meaningful measure of postural control for populations with  
431 inter-limb deficits (i.e. stroke population) [33, 36]. When the participant wore a passive prosthesis,  
432 the missing ankle function led to lack of CoP excursion on the amputated side and therefore lack  
433 of bilateral CoP synchronization [37]. When the participant can actively move the ankle via the  
434 EMG control signals, not only the CoP excursion magnitude increased on the amputated side, but  
435 also it showed improved synchronization with the CoP excursion in the intact side. This CoP  
436 synchronization restores the possibility of normative CoP control strategies in standing typically  
437 observed in healthy individuals (i.e. CoP-CoM to CoM acceleration relationship [38]). The  
438 observation implies the importance in restoring ankle control and function for enhanced postural  
439 stability and the potential of dEMG control for active control of prosthetic ankle. Additionally, by  
440 demonstrating the ability for a transtibial amputee to volitionally adjust CoP excursion while  
441 improving standing postural control, this is the first study to show the potential for this  
442 biomechanical feature to indicate prosthetic ankle control capability. Second, the between-limb  
443 coordination was also observed in EMG activation pattern as shown in Figure 5. After learning the  
444 dEMG control of prosthetic ankle in standing postural control, nearly synchronized activation  
445 between intact and residual TA/GA was observed. One of the open questions is what neural  
446 mechanisms are responsible for the observed adaptation in residual muscle activations. The  
447 observation of synchronized activation in homologous muscles between limbs cause us to consider  
448 the potential for a common neural drive behind the activity for both muscles. It would be an

449 interesting future direction to investigate the neuromuscular adaptation in lower limb amputees  
450 when the function of residual muscle activation is restored via dEMG control of prosthetic joints.

451

452 There is a lack of studies that have reported extended training and improvement in dEMG control  
453 in the lower limb with residual muscles. As a significant contribution, we developed a specific  
454 training paradigm guided by a physical therapist as well as acclimation strategy toward facilitating  
455 adaptation in residual antagonistic muscle activity. Instead of solely focusing on residual muscle  
456 activation for operation of prosthetic ankle (i.e. local joint level), our training also emphasized the  
457 full-body coordination and awareness in postural control while encouraging the participant in  
458 engaging prosthetic ankle via dEMG control during the task performance. Accordingly, over the  
459 course of training we witnessed various stages of learning from the amputee participant. During  
460 the initial training days (1 and 2) the amputee noted that he focused primarily on controlling the  
461 prosthetic ankle when completing the prescribed tasks. However, in the latter days of training (days  
462 3-5) the participant frequently mentioned focusing on whole-body movement, using his prosthetic  
463 and intact limb symmetrically. Huang et al. observed improvement in dEMG control of a prosthetic  
464 ankle during walking when they provided visual feedback of the ankle-joint angle [27],  
465 demonstrating the relevance of this joint-level focus when learning. We extend the results from  
466 this study by demonstrating the ability for an amputee to potentially continue the learning process  
467 beyond this joint level focus, without the use of visual feedback. Since this learning occurred in  
468 the absence of supplementary artificial feedback, only under the guidance of verbal feedback from  
469 a physical therapist, this type of training shows promise toward real-world application of dEMG  
470 control of a powered ankle prosthesis. While the stages of learning observed here are discussed  
471 qualitatively, future investigations of amputee learning the dEMG control of a prosthetic device

472 would benefit by analyzing the potential change in multi-joint muscle coordination via muscle  
473 synergy analysis [39, 40].

474

475 Our task-specific training, emphasizing both local joint control and full-body control, improved  
476 the participant's postural control capability significantly. Before conducting this study, we did not  
477 know whether our recruited amputee participant could coordinate his residual muscle activation  
478 appropriately for prosthetic ankle control to assist postural stability. This was because in our  
479 previous studies [26], in which the amputee participant was also a test participant, he showed  
480 average performance compared with other transtibial amputees when asked to coordinate residual  
481 antagonistic muscles to balance a virtual inverted pendulum with human-like dynamics in a sitting  
482 position. In addition, it was unclear how the participant's demographics, such as age (57y/o), BMI  
483 (~34), presence of vascular disease (including partial neuropathy at the intact foot), might affect  
484 his ability to improve control during training. Though these factors may have a significant negative  
485 effect on standing postural control [41-43] they are highly characteristic traits of the lower-limb  
486 amputee population [44, 45]. The before-training evaluation also showed limited muscle activation  
487 in residual TA (Figure 5) and comparable or even worse quiet standing test score (Table 2).  
488 However, when our training protocol was applied, we observed significant improvements in  
489 residual muscle control of the powered ankle prosthesis and postural control capability in both  
490 singular sessions and across training as a whole (Figure 4). Through this case study we have  
491 presented the first potential timeline for the improvement of dEMG control facilitated by PT-  
492 guided training over multiple days. Future study that wishes to accurately investigate the  
493 usefulness of dEMG control of lower-limb prostheses should consider the potential stage of

494 learning of the individual amputees and the influence of improvement that can come with time and  
495 appropriate training.

496

497 The results from this study have several implications for the potential clinical benefit of dEMG  
498 control of a powered prosthetic ankle. During the follow-up evaluation of the load transfer task we  
499 observed the participant had limited range of motion with his passive prosthetic ankle, likely due  
500 to minimal change in angle of the stiff ankle joint. Hence, compensation with more trunk flexion  
501 was used, which is a known problem for back injuries during weightlifting. The participant was  
502 able to significantly change ankle angle using the dEMG control ankle allowing for an improved  
503 overall postural configuration (i.e. more vertical trunk angle) [46] in lifting, which could  
504 significantly prevent secondary injuries post amputation. In addition, this study has taken one of  
505 the first steps, via direct EMG control, toward addressing the normalization of other functional  
506 tasks (aside from locomotion) that are critical to daily life activities and amputee quality of life.

507

508 Our study included one amputee to investigate the feasibility of dEMG control of a powered ankle  
509 for enhanced postural control. Although exciting results were observed, this case study was  
510 insufficient to conclude the benefit of dEMG control of powered ankles. Future work should  
511 expand this current case study to include more participants to understand the applicability to the  
512 general amputee population. It would be interesting in future study for more measures of stability  
513 (including center of mass, joint torque symmetry, etc.) to further inform the effect of dEMG control  
514 of a powered ankle prosthesis. Though its effect is not specifically addressed in the context of this  
515 study, future study would benefit to evaluate the effect of prosthetic socket design on residual  
516 muscle activations during EMG control of lower-limb prostheses.



517

518 **Conclusion**

519 This case study was the first attempt to demonstrate the feasibility and potential for direct EMG  
520 control of a powered prosthetic ankle, combined with PT-guided training, to enhance standing  
521 postural control across various contexts and tasks. The participant when using dEMG-controlled  
522 powered ankle yielded improved clinical balance score, reduced compensation from the intact  
523 joints, and improved between-limb coordination, compared to those when using his daily passive  
524 prosthesis. In addition, the case study developed a PT-guided training protocol for transtibial  
525 amputees, which is necessary for them in learning dEMG control of powered ankle to assist  
526 postural control and improve postural stability. This case study has developed the grounds for  
527 future design of versatile and agile powered lower-limb prostheses via direct, continuous EMG  
528 control via residual muscles, which may further improve the motor function of individuals with  
529 lower limb amputations and improve the ability for amputees to navigate standing postural control  
530 tasks that are a significant portion of daily-life activities.

531

532

533

534

535

536

537

538

539

540

541

542

543

544

545

546

547

548

549 **Declarations**

550 *Ethics approval and consent to participate*

551 The experimental protocol was approved by the Institutional Review Board at the University of  
552 North Carolina – Chapel Hill. All participants provided written, informed consent.

553

554 *Consent for publication*

555 The participant provided written, informed consent for publication.

556

557 *Availability of data and material*

558 The datasets used and/or analyzed during the current study are available from the corresponding  
559 author on reasonable request.

560

561 *Competing interests*

562 The authors declare that they have no competing interests.

563

564 *Funding*

565 Funding for this research project comes from NIH NICHD F31HD101285, NIH EB024570.

566

567 *Authors' contributions*

568 SH, and HH contributed to the design of the experiment. SH, EB, and FH conducted the  
569 experiments. AF and SH processed the data. AF, SH, and HH wrote the manuscript. All authors  
570 contributed to the analysis and interpretation of the results and read and approved the final  
571 manuscript.

572

573 *Acknowledgements*

574 The authors would like to acknowledge Abby Sweitzer and Loryn Boorstein for their help with  
575 data collection. We'd also like to thank all the undergraduate researchers and participants for  
576 their time and assistance with this research project.

577 **Figures**

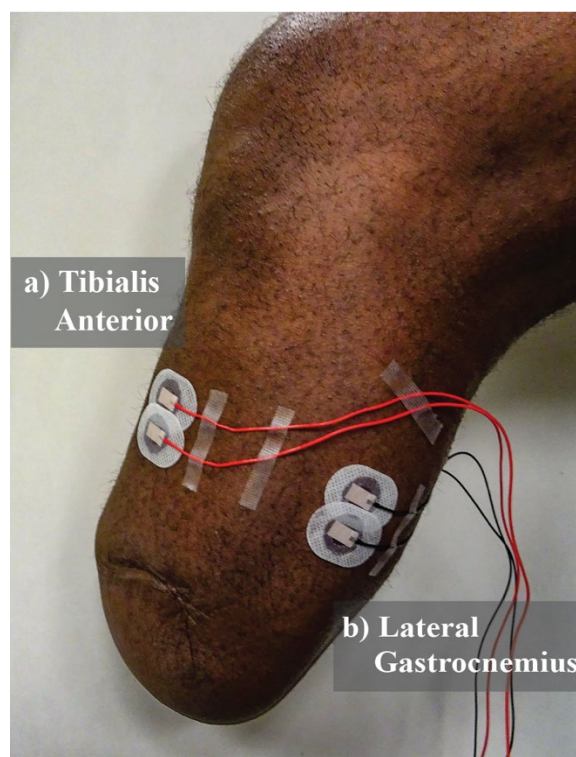

578

579 **Figure 1.** Residual limb electrode placement. a) Tibialis Anterior electrodes. b) Lateral  
580 Gastrocnemius electrodes. Electrodes are placed in line with muscle belly (location determined  
581 through palpation as amputee is asked to contract muscle). Cables are routed away from bony  
582 landmarks.

583

584

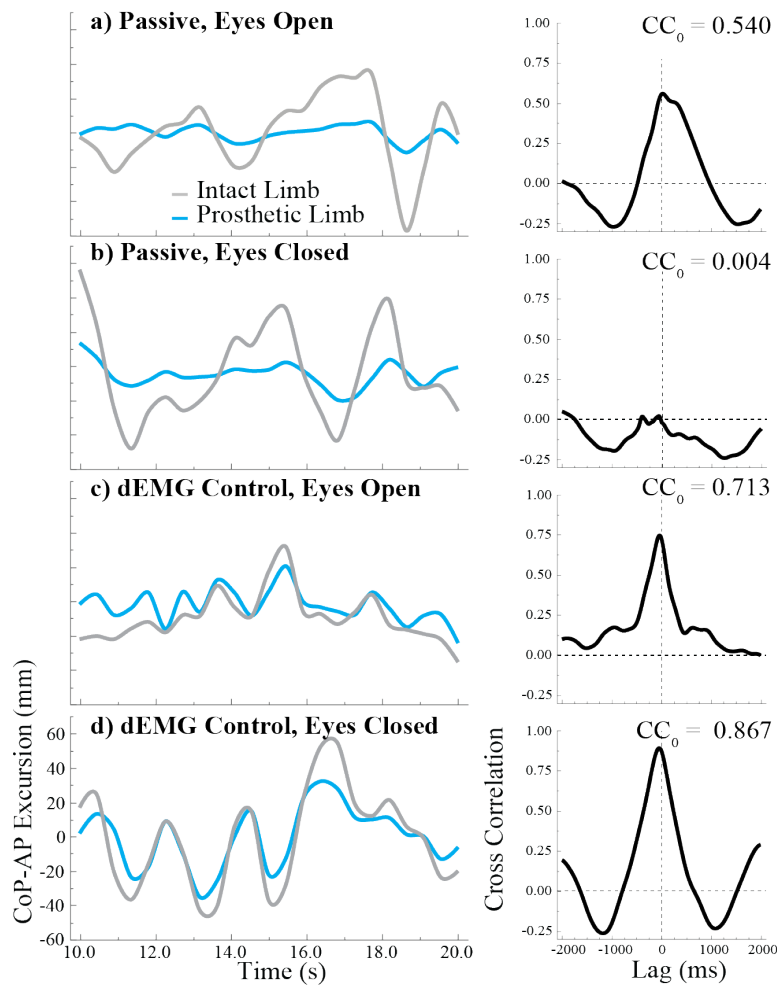

585

586

587

588

589

590

591

**Figure 2:** Passive vs. Post-training dEMG control on the Foam Surface. Representative center of pressure excursion and cross correlation between limbs. Representative trials are 10 second portions taken from each 30-second trial. Trials shown above are firm surface only. a) Passive device, eyes open condition b) Passive device, eyes closed condition c) dEMG controlled device, eyes open d) dEMG controlled device, eyes closed.

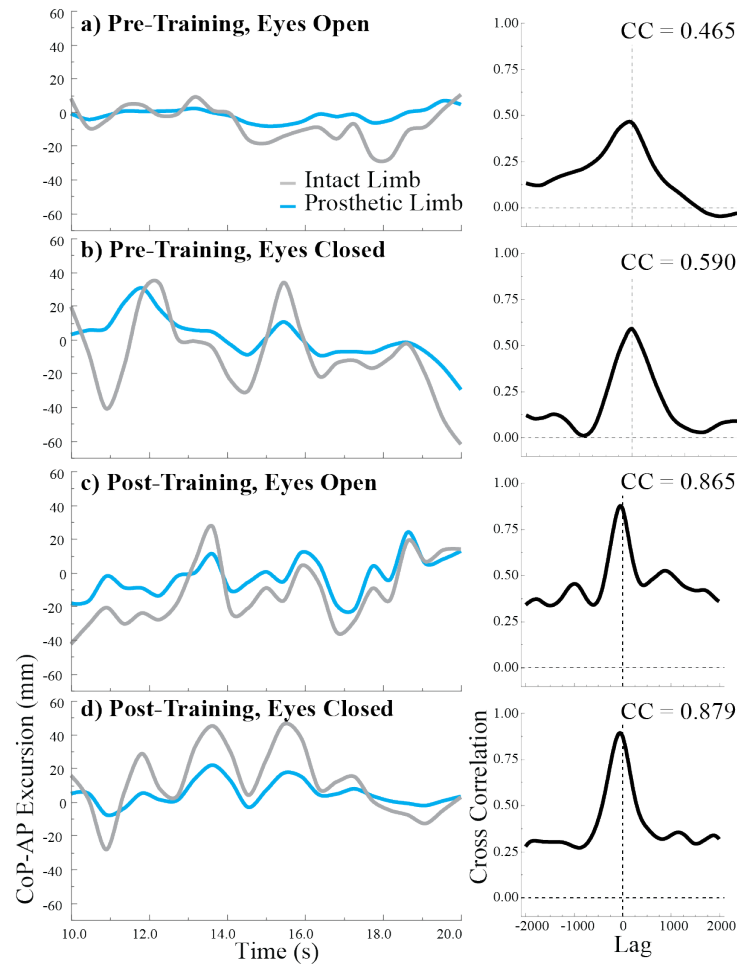

592  
593  
594  
595  
596  
597  
598  
599

**Figure 3:** Pre vs. Post-training with dEMG control on the Firm Ground. Representative Center of Pressure excursion and Cross Correlation between limbs. Representative trials are 10 second portions taken from each 30-second trial. Trials shown above are firm surface only. a) Pre-training, eyes open condition b) Pre-training, eyes closed condition c) Post-training, eyes closed condition d) post-training, eyes closed condition.

600

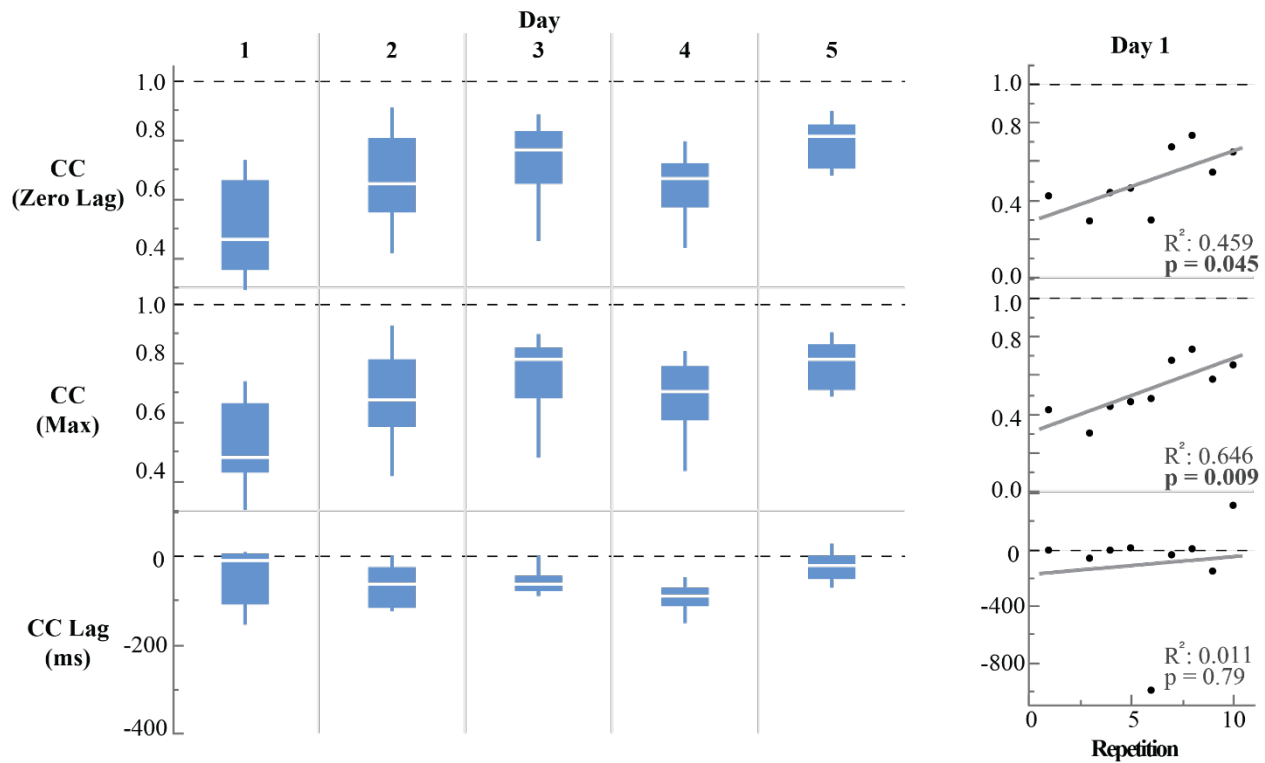

601

602 **Figure 4.** CoP synchronization values during training for the load transfer task. R-squared values  
603 and p-value are shown for Cross-Correlation (CC) values (CC at zero lag, maximum CC, and lag  
604 of maximum CC from zero lag) for day 1 of training. Due to concern for residual muscle fatigue  
605 during training, Day 1 and 2 contained less than 10 repetitions.

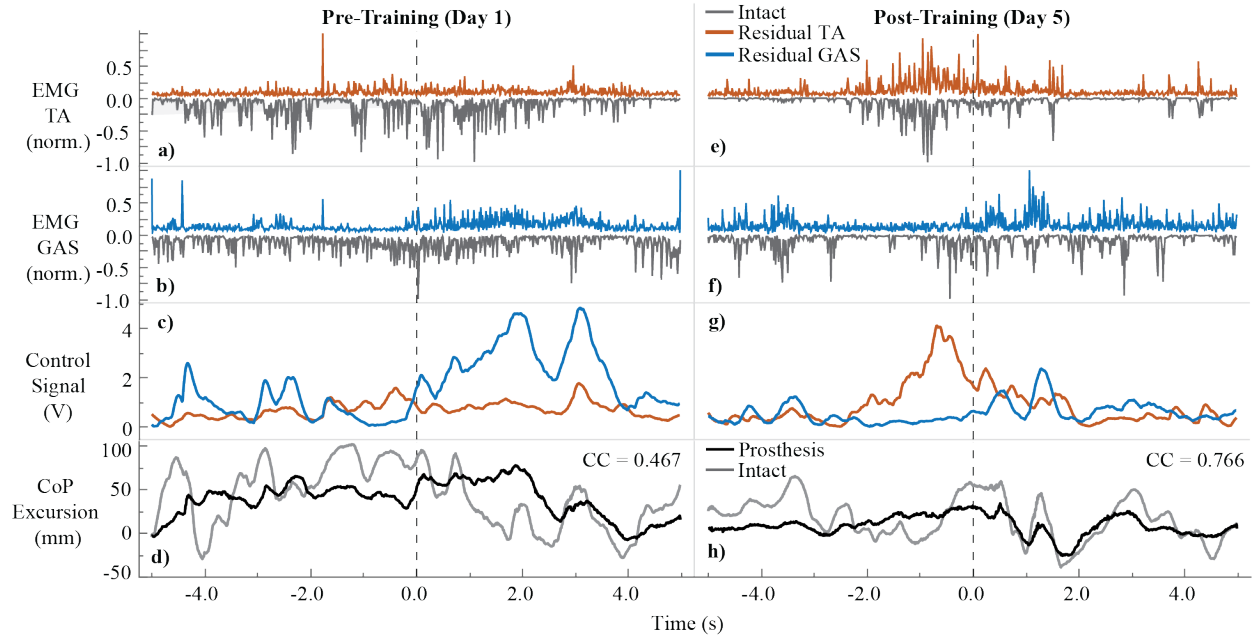

606  
607  
608  
609  
610  
611  
612  
613  
614

**Figure 5:** Representative load transfer trials pre and post-training. Dashed Line) moment of peak deceleration during squatting movement. **a)** normalized EMG of residual (orange) and intact (grey) TA muscle pair. **b)** Normalized EMG of residual (blue) and intact (grey) GAS muscle pair. **c)** Control signal to the prosthesis from the real-time processing of residual TA (orange) and residual GAS (blue) muscle EMG. **d)** CoP excursion from prosthetic (black) and intact foot (grey). Cross-correlation values are displayed for each representative trial (Pre: CC = 0.467, Post: CC = 0.766). **e-h)** Data for post-training. Normalized EMG was calculated by dividing the maximum EMG value for each muscle from the entire trial.

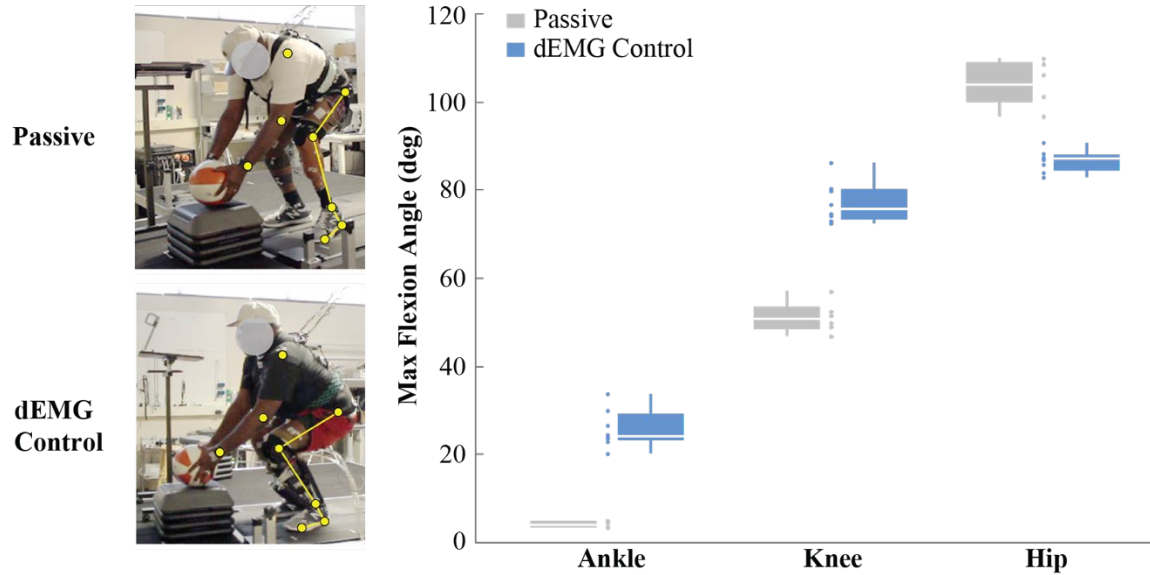

615  
616  
617  
618  
619  
620  
621  
622  
623  
624  
625

**Figure 6.** Load transfer task joint flexion angles (Passive vs. Post-Training dEMG Control). *Grey*) Passive prosthetic ankle, hip, and knee joint flexion on affected limb at peak squat depth (as determined by location of hip joint center). *Blue*) dEMG controlled prosthetic ankle, hip, and knee joint flexion at peak squat depth. Joint flexion angles determined as the difference between angle at maximum depth and angle during quiet standing.



## 626 References

- 627 [1] S. Au, M. Berniker, and H. Herr, "Powered ankle-foot prosthesis to assist level-ground and stair-  
628 descent gaits," *Neural Netw*, vol. 21, no. 4, pp. 654-66, May 2008, doi:  
629 10.1016/j.neunet.2008.03.006.
- 630 [2] F. Sup, H. A. Varol, J. Mitchell, T. J. Withrow, and M. Goldfarb, "Self-Contained Powered Knee  
631 and Ankle Prosthesis: Initial Evaluation on a Transfemoral Amputee," *IEEE Int Conf Rehabil  
632 Robot*, vol. 2009, pp. 638-644, Jun 23 2009, doi: 10.1109/ICORR.2009.5209625.
- 633 [3] E. J. Rouse, L. M. Mooney, E. C. Martinez-Villalpando, and H. M. Herr, "Clutchable series-  
634 elastic actuator: design of a robotic knee prosthesis for minimum energy consumption," *IEEE Int  
635 Conf Rehabil Robot*, vol. 2013, p. 6650383, Jun 2013, doi: 10.1109/ICORR.2013.6650383.
- 636 [4] T. Lenzi, M. Cempini, L. Hargrove, and T. Kuiken, "Design, development, and testing of a  
637 lightweight hybrid robotic knee prosthesis," *The International Journal of Robotics Research*, vol.  
638 37, no. 8, pp. 953-976, 2018.
- 639 [5] J. Hitt, R. Bellman, M. Holgate, T. Sugar, and K. Hollander, "The SPARKy (Spring Ankle With  
640 Regenerative Kinetics) Project: Design and Analysis of a Robotic Transtibial Prosthesis With  
641 Regenerative Kinetics," presented at the ASME 2007 International Design Engineering Technical  
642 Conferences and Computers and Information in Engineering Conference Las Vegas, NV, 2007.
- 643 [6] M. R. Tucker, C. Shirota, O. Lambercy, J. S. Sulzer, and R. Gassert, "Design and  
644 Characterization of an Exoskeleton for Perturbing the Knee During Gait," (in English), *Ieee T  
645 Bio-Med Eng*, vol. 64, no. 10, pp. 2331-2343, Oct 2017, doi: 10.1109/Tbme.2017.2656130.
- 646 [7] M. Liu, F. Zhang, P. Datsoris, and H. Huang, "Improving finite state impedance control of active  
647 transfemoral prostheses using Dempster-Shafer state transition rules," *Journal of Intelligent and  
648 Robotic Systems*, vol. 76, pp. 461-74, 2014.
- 649 [8] Y. Wen, J. Si, A. Brandt, G. Xiang, and H. Huang, "Online Reinforcement Learning Control for  
650 the Personalization of a Robotic Knee Prosthesis," *IEEE Trans Cybern.*, 2019 (Accepted).
- 651 [9] D. Quintero, D. J. Villarreal, D. J. Lambert, S. Kapp, and R. D. Gregg, "Continuous-Phase  
652 Control of a Powered Knee-Ankle Prosthesis: Amputee Experiments Across Speeds and  
653 Inclines," *IEEE Trans Robot*, vol. 34, no. 3, pp. 686-701, Jun 2018, doi:  
654 10.1109/TRO.2018.2794536.
- 655 [10] M. W. Legro, G. E. Reiber, J. M. Czerniecki, and B. J. Sangeorzan, "Recreational activities of  
656 lower-limb amputees with prostheses," *J Rehabil Res Dev*, vol. 38, no. 3, pp. 319-25, May-Jun  
657 2001. [Online]. Available: <https://www.ncbi.nlm.nih.gov/pubmed/11440263>.
- 658 [11] A. Brandt, Y. Wen, M. Liu, J. Stallings, and H. H. Huang, "Interactions Between Transfemoral  
659 Amputees and a Powered Knee Prosthesis During Load Carriage," *Sci Rep*, vol. 7, no. 1, p.  
660 14480, Nov 3 2017, doi: 10.1038/s41598-017-14834-7.
- 661 [12] P. X. Ku, N. A. Abu Osman, and W. A. Wan Abas, "Balance control in lower extremity amputees  
662 during quiet standing: a systematic review," *Gait Posture*, vol. 39, no. 2, pp. 672-82, Feb 2014,  
663 doi: 10.1016/j.gaitpost.2013.07.006.
- 664 [13] D. Bolger, L. H. Ting, and A. Sawers, "Individuals with transtibial limb loss use interlimb force  
665 asymmetries to maintain multi-directional reactive balance control," *Clinical Biomechanics*, vol.  
666 29, no. 9, pp. 1039-1047, 2014.
- 667 [14] B. E. Lawson, H. A. Varol, and M. Goldfarb, "Standing stability enhancement with an intelligent  
668 powered transfemoral prosthesis," *IEEE Trans Biomed Eng*, vol. 58, no. 9, pp. 2617-24, Sep  
669 2011, doi: 10.1109/TBME.2011.2160173.
- 670 [15] F. Zhang and H. Huang, "Source selection for real-time user intent recognition toward volitional  
671 control of artificial legs," *IEEE J Biomed Health Inform*, vol. 17, no. 5, pp. 907-14, Sep 2013,  
672 doi: 10.1109/JBHI.2012.2236563.
- 673 [16] J. D. Miller, M. S. Beazer, and M. E. Hahn, "Myoelectric walking mode classification for  
674 transtibial amputees," *IEEE Trans Biomed Eng*, vol. 60, no. 10, pp. 2745-50, Oct 2013, doi:  
675 10.1109/TBME.2013.2264466.

- 676 [17] H. Huang, T. A. Kuiken, and R. D. Lipschutz, "A strategy for identifying locomotion modes  
677 using surface electromyography," *IEEE Trans Biomed Eng*, vol. 56, no. 1, pp. 65-73, Jan 2009,  
678 doi: 10.1109/TBME.2008.2003293.
- 679 [18] H. Huang, F. Zhang, L. J. Hargrove, Z. Dou, D. R. Rogers, and K. B. Englehart, "Continuous  
680 locomotion-mode identification for prosthetic legs based on neuromuscular-mechanical fusion,"  
681 *IEEE Trans Biomed Eng*, vol. 58, no. 10, pp. 2867-75, Oct 2011, doi:  
682 10.1109/TBME.2011.2161671.
- 683 [19] L. J. Hargrove, H. Huang, A. E. Schultz, B. A. Lock, R. Lipschutz, and T. A. Kuiken, "Toward  
684 the development of a neural interface for lower limb prosthesis control," *Conf Proc IEEE Eng  
685 Med Biol Soc*, vol. 2009, pp. 2111-4, 2009, doi: 10.1109/IEMBS.2009.5334303.
- 686 [20] J. Wang, O. A. Kannape, and H. M. Herr, "Proportional EMG control of ankle plantar flexion in a  
687 powered transtibial prosthesis," *IEEE Int Conf Rehabil Robot*, vol. 2013, p. 6650391, Jun 2013,  
688 doi: 10.1109/ICORR.2013.6650391.
- 689 [21] J. A. Dawley, K. B. Fite, and G. D. Fulk, "EMG control of a bionic knee prosthesis: exploiting  
690 muscle co-contractions for improved locomotor function," *IEEE Int Conf Rehabil Robot*, vol.  
691 2013, p. 6650389, Jun 2013, doi: 10.1109/ICORR.2013.6650389.
- 692 [22] T. R. Clites *et al.*, "Proprioception from a neurally controlled lower-extremity prosthesis," *Sci  
693 Transl Med*, vol. 10, no. 443, May 30 2018, doi: 10.1126/scitranslmed.aap8373.
- 694 [23] S. Huang, J. P. Wensman, and D. P. Ferris, "Locomotor Adaptation by Transtibial Amputees  
695 Walking With an Experimental Powered Prosthesis Under Continuous Myoelectric Control," (in  
696 English), *Ieee T Neur Sys Reh*, vol. 24, no. 5, pp. 573-581, May 2016, doi:  
697 10.1109/Tnsre.2015.2441061.
- 698 [24] S. Huang and H. Huang, "Voluntary Control of Residual Antagonistic Muscles in Transtibial  
699 Amputees: Reciprocal Activation, Coactivation, and Implications for Direct Neural Control of  
700 Powered Lower Limb Prostheses," *IEEE Trans Neural Syst Rehabil Eng*, vol. 27, no. 1, pp. 85-  
701 95, Jan 2019, doi: 10.1109/TNSRE.2018.2885641.
- 702 [25] S. Huang and H. Huang, "Voluntary Control of Residual Antagonistic Muscles in Transtibial  
703 Amputees: Feedforward Ballistic Contractions and Implications for Direct Neural Control of  
704 Powered Lower Limb Prostheses," *IEEE Trans Neural Syst Rehabil Eng*, vol. 26, no. 4, pp. 894-  
705 903, Apr 2018, doi: 10.1109/TNSRE.2018.2811544.
- 706 [26] A. Fleming, S. Huang, and H. Huang, "Proportional Myoelectric Control of a Virtual Inverted  
707 Pendulum Using Residual Antagonistic Muscles: Toward Voluntary Postural Control," *IEEE  
708 Trans Neural Syst Rehabil Eng*, vol. 27, no. 7, pp. 1473-1482, Jul 2019, doi:  
709 10.1109/TNSRE.2019.2922102.
- 710 [27] S. Huang, J. P. Wensman, and D. P. Ferris, "Locomotor Adaptation by Transtibial Amputees  
711 Walking With an Experimental Powered Prosthesis Under Continuous Myoelectric Control,"  
712 *IEEE Trans Neural Syst Rehabil Eng*, vol. 24, no. 5, pp. 573-81, May 2016, doi:  
713 10.1109/TNSRE.2015.2441061.
- 714 [28] T. R. Clites *et al.*, "Proprioception from a neurally controlled lower-extremity prosthesis," *Sci  
715 Transl Med*, vol. 10, no. 443, p. eaap8373, 2018.
- 716 [29] S. Huang, J. P. Wensman, and D. P. Ferris, "An Experimental Powered Lower Limb Prosthesis  
717 Using Poportional Myoelectric Control," *Journal Medical Devices*, vol. 8, no. 2, 2014.
- 718 [30] S. Huang and H. H. Huang, "Voluntary Control of Residual Antagonistic Muscles in Transtibial  
719 Amputees: Reciprocal Activation, Coactivation, and Implications for Direct Neural Control of  
720 Powered Lower Limb Prostheses," *IEEE Trans Neural Syst Rehabil Eng*, Dec 7 2018, doi:  
721 10.1109/TNSRE.2018.2885641.
- 722 [31] F. B. Horak, D. M. Wrisley, and J. Frank, "The balance evaluation systems test (BESTest) to  
723 differentiate balance deficits," *Physical therapy*, vol. 89, no. 5, pp. 484-498, 2009.
- 724 [32] S. Huang and D. P. Ferris, "Muscle activation patterns during walking from transtibial amputees  
725 recorded within the residual limb-prosthetic interface," *J Neuroeng Rehabil*, vol. 9, p. 55, Aug 10  
726 2012, doi: 10.1186/1743-0003-9-55.

- 727 [33] A. Mansfield, C. J. Danells, E. Inness, G. Mochizuki, and W. E. McIlroy, "Between-limb  
728 synchronization for control of standing balance in individuals with stroke," *Clinical*  
729 *Biomechanics*, vol. 26, no. 3, pp. 312-317, 2011.
- 730 [34] V. C. Dionisio, G. L. Almeida, M. Duarte, and R. P. Hirata, "Kinematic, kinetic and EMG  
731 patterns during downward squatting," *Journal of Electromyography and Kinesiology*, vol. 18, no.  
732 1, pp. 134-143, 2008.
- 733 [35] M. R. Tucker *et al.*, "Control strategies for active lower extremity prosthetics and orthotics: a  
734 review," *J Neuroeng Rehabil*, vol. 12, p. 1, Jan 5 2015, doi: 10.1186/1743-0003-12-1.
- 735 [36] A. Mansfield, G. Mochizuki, E. L. Inness, and W. E. McIlroy, "Clinical correlates of between-  
736 limb synchronization of standing balance control and falls during inpatient stroke rehabilitation,"  
737 *Neurorehabilitation and neural repair*, vol. 26, no. 6, pp. 627-635, 2012.
- 738 [37] D. F. Rusaw and S. Ramstrand, "Validation of the Inverted Pendulum Model in standing for  
739 transtibial prosthesis users," *Clinical Biomechanics*, vol. 31, pp. 100-106, 2016.
- 740 [38] D. A. Winter, A. E. Patla, F. Prince, M. Ishac, and K. Gielo-Periczak, "Stiffness control of balance  
741 in quiet standing," *Journal of neurophysiology*, vol. 80, no. 3, pp. 1211-1221, 1998.
- 742 [39] M. L. Latash, "Motor synergies and the equilibrium-point hypothesis," *Motor control*, vol. 14, no.  
743 3, pp. 294-322, 2010.
- 744 [40] A. Danna-dos-Santos, K. Slomka, V. M. Zatsiorsky, and M. L. Latash, "Muscle modes and  
745 synergies during voluntary body sway," *Experimental Brain Research*, vol. 179, no. 4, pp. 533-  
746 550, 2007.
- 747 [41] P. X. Ku, N. A. Osman, A. Yusof, and W. W. Abas, "Biomechanical evaluation of the  
748 relationship between postural control and body mass index," *Journal of biomechanics*, vol. 45,  
749 no. 9, pp. 1638-1642, 2012.
- 750 [42] P. A. Hageman, J. M. Leibowitz, and D. Blanke, "Age and gender effects on postural control  
751 measures," *Archives of physical medicine and rehabilitation*, vol. 76, no. 10, pp. 961-965, 1995.
- 752 [43] D. Lafond, H. Corriveau, and F. Prince, "Postural control mechanisms during quiet standing in  
753 patients with diabetic sensory neuropathy," *Diabetes care*, vol. 27, no. 1, pp. 173-178, 2004.
- 754 [44] K. Ziegler-Graham, E. J. MacKenzie, P. L. Ephraim, T. G. Trivison, and R. Brookmeyer,  
755 "Estimating the prevalence of limb loss in the United States: 2005 to 2050," *Archives of physical*  
756 *medicine and rehabilitation*, vol. 89, no. 3, pp. 422-429, 2008.
- 757 [45] D. E. Rosenberg *et al.*, "Body mass index patterns following dysvascular lower extremity  
758 amputation," *Disability and rehabilitation*, vol. 35, no. 15, pp. 1269-1275, 2013.
- 759 [46] M. Cole and P. Grimshaw, "Low back pain and lifting: a review of epidemiology and aetiology,"  
760 *Work*, vol. 21, no. 2, pp. 173-184, 2003.
- 761
